# Supplementary material for: Identification and validation of metabolism-related hub genes in idiopathic pulmonary fibrosis
Source: Front Genet. 2023 Feb 27;14:1058582. doi: 10.3389/fgene.2023.1058582 (PMC10010493; doi:10.3389/fgene.2023.1058582)
Supplement: Supplementary file 6 [file Table1.XLSX]

## Sheet: 1.MRG(kegg)
Supplementary Table S1: Metabolism-related terms in the KEGG gene set
KEGG_GLYCEROLIPID_METABOLISM	Glycerolipid_Metabolism	MBOAT2	GPAM	LIPG	DGKZ	DGKE	DGKD	DGKH	MBOAT1	GK	DGAT2	GK2	GLA	ALDH7A1	AGK	TKFC	AGPAT3	AWAT2	AGPAT4	AKR1B1	PNLIPRP2	PNLIPRP1	PNLIP	DGAT1	GLYCTK	LPL	ALDH1B1	DGKQ	ALDH2	DGKB	DGKG	AKR1A1	DGKA	PLPP3	LIPC	DGKI	LCLAT1	GPAT3	MGLL	GPAT4	ALDH9A1	ALDH3A2	PNPLA3	PLPP1	PLPP2	AGPAT1	AGPAT2	CEL	GPAT2
KEGG_GLYCEROPHOSPHOLIPID_METABOLISM	Glycerophospholipid_Metabolism	PEMT	PLA2G15	GPD1	GPD1L	LPGAT1	GPAM	MBOAT2	MBOAT7	CHAT	LPCAT1	PTDSS1	ACHE	PLA2G3	DGKZ	ETNK1	DGKE	DGKD	PCYT1A	DGKH	JMJD7-PLA2G4B	CHPT1	MBOAT1	PLA2G6	PLA2G2E	PLA2G10	LPCAT3	PLA2G2A	ETNK2	PLA2G4A	PLA2G5	PLA2G12B	PLA2G4B	PTDSS2	PLA2G2F	PCYT2	CDS1	AGPAT3	AGPAT4	PGS1	LYPLA1	PLA2G1B	ADPRM	CDIPT	DGKQ	CDS2	DGKB	DGKG	PLPP3
KEGG_ETHER_LIPID_METABOLISM	Ether_Lipid_Metabolism	ENPP2	PAFAH1B1	PLPP3	LPCAT1	PLA2G3	ENPP6	LPCAT4	PLA2G4E	JMJD7-PLA2G4B	CHPT1	AGPS	PLA2G6	PAFAH1B3	PLA2G2E	PLA2G10	PAFAH2	PLA2G2A	PLA2G4A	PLA2G5	PLA2G12B	PLA2G4B	PLA2G7	PLA2G2F	PLPP1	PLPP2	PLA2G2C	PAFAH1B2	PLA2G2D	LPCAT2	PLD1	PLA2G12A	PLD2	PLA2G1B
KEGG_ARACHIDONIC_ACID_METABOLISM	Arachidonic_Acid_Metabolism	EPHX2	CYP2E1	ALOX5	CYP4A11	CYP2J2	GGT1	PLA2G3	AKR1C3	PTGIS	ALOX12B	CYP4F2	CYP2C18	PTGES2	ALOX15B	ALOX15	JMJD7-PLA2G4B	PLA2G6	PLA2G2E	PLA2G10	PLA2G2A	PLA2G4A	PLA2G5	PTGS2	PLA2G12B	PTGS1	PLA2G4B	PLA2G2F	ALOX12	CYP2C9	GPX7	GPX6	CYP2C19	CYP2C8	CBR1	CYP2B6	CBR3	CYP2U1	PLA2G1B	LTA4H	PTGES	GPX5	GPX1	CYP4A22	GPX2	GPX3	GPX4	CYP4F3	PLA2G4E
KEGG_LINOLEIC_ACID_METABOLISM	Linoleic_Acid_Metabolism	CYP2E1	CYP3A5	CYP2J2	CYP3A4	PLA2G3	AKR1B10	CYP2C18	CYP1A2	ALOX15	PLA2G4E	JMJD7-PLA2G4B	PLA2G6	PLA2G2E	PLA2G10	PLA2G2A	PLA2G4A	CYP3A43	PLA2G5	PLA2G12B	PLA2G4B	PLA2G2F	PLA2G2C	PLA2G2D	CYP2C9	PLA2G12A	CYP2C19	CYP2C8	CYP3A7	PLA2G1B
KEGG_ALPHA_LINOLENIC_ACID_METABOLISM	Alpha_Linolenic_Acid_Metabolism	JMJD7-PLA2G4B	PLA2G6	PLA2G2E	PLA2G10	PLA2G2A	PLA2G4A	PLA2G5	PLA2G12B	PLA2G4B	PLA2G2F	FADS2	ACOX3	PLA2G2C	PLA2G2D	PLA2G3	PLA2G12A	ACOX1	PLA2G4E	PLA2G1B
KEGG_SPHINGOLIPID_METABOLISM	Sphingolipid_Metabolism	GAL3ST1	SGPP2	GLB1	GALC	SGMS2	GBA	SPHK2	NEU2	PLPP3	NEU1	ACER2	UGCG	DEGS2	ARSA	SPHK1	SGPL1	NEU3	SMPD4	SGMS1	ACER3	CERK	SMPD2	ENPP7	DEGS1	SGPP1	NEU4	GLA	ACER1	PLPP1	ASAH1	PLPP2	SMPD1	B4GALT6	SPTLC2	SPTLC1	SMPD3	KDSR	UGT8	ASAH2
KEGG_RIBOFLAVIN_METABOLISM	Riboflavin_Metabolism	ACP4	ENPP3	ENPP1	ACP6	RFK	ACP3	FLAD1	TYR	MTMR7	MTMR6	PHPT1	MTMR1	ACP1	ACP2	ACP5	MTMR2
KEGG_NICOTINATE_AND_NICOTINAMIDE_METABOLISM	Nicotinate_And_Nicotinamide_Metabolism	NMNAT1	NT5C2	ENPP3	ENPP1	BST1	NNT	AOX1	CD38	NT5M	NADSYN1	NUDT12	NT5C1B	NT5C3A	NMRK1	NT5C1A	QPRT	NAMPT	NT5C	NMNAT3	PNP	NMNAT2	NT5E	NADK	NNMT
KEGG_FRUCTOSE_AND_MANNOSE_METABOLISM	Fructose_And_Mannose_Metabolism	MPI	PMM2	PMM1	FBP2	PFKM	GMDS	PFKFB4	PFKL	MTMR6	TPI1	PHPT1	PFKFB3	FCSK	PFKFB2	MTMR1	PFKFB1	AKR1B10	FPGT	KHK	FBP1	MTMR2	HK2	HK3	HK1	ALDOA	ALDOC	ALDOB	MTMR7	GFUS	AKR1B1	SORD	GMPPA	PFKP	GMPPB
KEGG_GALACTOSE_METABOLISM	Galactose_Metabolism	GCK	GALK1	GLB1	GALE	B4GALT1	PGM2	LALBA	PFKM	PFKL	MGAM	HK2	HK1	HK3	GALT	G6PC2	GLA	GANC	LCT	GALK2	G6PC1	UGP2	PGM1	AKR1B1	B4GALT2	GAA	PFKP
KEGG_ASCORBATE_AND_ALDARATE_METABOLISM	Ascorbate_And_Aldarate_Metabolism	UGT1A10	UGT1A8	UGT1A7	UGT1A6	ALDH1B1	UGT2B28	ALDH2	UGT1A5	MIOX	UGDH	UGT2A1	ALDH9A1	ALDH3A2	UGT1A9	ALDH7A1	UGT2B11	UGT2B10	UGT2B7	UGT2B4	UGT2A3	UGT1A4	UGT1A1	UGT2B17	UGT1A3	UGT2B15
KEGG_FATTY_ACID_METABOLISM	Fatty_Acid_Metabolism	CPT1A	CPT1C	ACADS	ALDH1B1	ACADSB	ACADL	ALDH2	ACADM	CYP4A11	ACAT2	ACADVL	ACAT1	ACAA2	HADH	HADHB	HADHA	CYP4A22	ADH7	ADH6	ACSL6	ADH1B	ADH1C	ADH4	ECHS1	ADH5	ALDH9A1	ALDH3A2	ACSL5	ADH1A	EHHADH	GCDH	ALDH7A1	ACOX3	ACSL1	ACAA1	CPT2	CPT1B	ACOX1	ECI2	ECI1	ACSL3	ACSL4
KEGG_PURINE_METABOLISM	Purine_Metabolism	POLR2G	NT5C2	POLR2H	ENPP3	POLR2E	POLR2F	ENPP1	XDH	POLR2I	POLR2J	POLE3	ADSS2	PRPS2	ADSL	NME6	POLR1D	PNPT1	POLR2K	PDE11A	POLD3	POLR2L	AK1	NME1-NME2	AK2	AK4	POLA2	CANT1	AMPD1	AMPD3	AMPD2	NME4	GUCY2D	NME1	ATIC	NME2	DGUOK	POLR3C	NME3	POLR3G	POLR3F	PRUNE1	ADPRM	PDE4B	PDE4C	PDE3B	PDE4A	NUDT2	GMPR2
KEGG_PYRIMIDINE_METABOLISM	Pyrimidine_Metabolism	NT5C2	POLR2G	POLR2H	POLR2E	POLR2F	POLR2I	POLR2J	POLE3	TYMS	TXNRD1	NME6	POLR1D	PNPT1	POLR2K	DHODH	POLD3	POLR2L	NME1-NME2	POLA2	UPRT	CANT1	NME4	NME1	NME2	NME3	POLR3C	POLR3G	POLR3F	NUDT2	PRIM1	PRIM2	NME5	POLD4	DTYMK	CTPS1	POLA1	ENTPD8	POLE2	POLD1	POLD2	POLE	CAD	CMPK2	POLR1E	NT5C1A	POLR3A	DCTD	POLR2B
KEGG_ALANINE_ASPARTATE_AND_GLUTAMATE_METABOLISM	Alanine_Aspartate_And_Glutamate_Metabolism	GLUD2	GFPT2	AGXT2	CPS1	GLS2	ABAT	ADSS2	ADSL	GLUD1	GLS	ASL	IL4I1	GPT	GFPT1	GPT2	DDO	ADSS1	ACY3	GAD1	GAD2	GOT2	AGXT	GLUL	NIT2	GOT1	ALDH4A1	CAD	ALDH5A1	ASS1	ASNS	PPAT	ASPA
KEGG_GLYCINE_SERINE_AND_THREONINE_METABOLISM	Glycine_Serine_And_Threonine_Metabolism	ALAS1	ALAS2	GLYCTK	MAOB	AGXT2	MAOA	AOC2	GATM	SDS	AOC3	GNMT	SHMT1	GCAT	PHGDH	DMGDH	SHMT2	SRR	PSAT1	BHMT	GLDC	DLD	GAMT	PSPH	AGXT	SARDH	AMT	CHDH	CBS	CTH	PIPOX	DAO
KEGG_CYSTEINE_AND_METHIONINE_METABOLISM	Cysteine_And_Methionine_Metabolism	AMD1	SRM	ADI1	AHCY	DNMT1	SDS	TRDMT1	DNMT3A	DNMT3B	LDHC	IL4I1	SMS	LDHB	ENOPH1	BHMT	GOT2	CDO1	APIP	GOT1	LDHAL6B	TAT	AHCYL1	MTAP	MAT2B	LDHA	MTR	CBS	MAT1A	AHCYL2	CTH	MAT2A	MPST	LDHAL6A	DNMT3L
KEGG_ARGININE_AND_PROLINE_METABOLISM	Arginine_And_Proline_Metabolism	SRM	AZIN2	GLUD2	GLS2	ARG1	ARG2	GLUD1	GLS	ASL	CKMT1A	P4HA2	SMS	CKB	NOS3	NOS2	NOS1	GOT2	GLUL	P4HA1	AOC1	ALDH7A1	LAP3	AGMAT	GOT1	PYCR1	ASS1	ALDH18A1	SAT1	NAGS	DAO	AMD1	MAOB	MAOA	CPS1	P4HA3	ALDH1B1	GATM	ALDH2	OTC	PRODH2	OAT	CKM	ACY1	SAT2	ALDH9A1	ALDH3A2	CKMT1B	PYCR3
KEGG_HISTIDINE_METABOLISM	Histidine_Metabolism	CNDP1	MAOB	MAOA	ALDH1B1	ALDH2	METTL6	ALDH3A1	BUD23	HAL	HNMT	DDC	ACY3	ALDH1A3	METTL2B	ALDH3B1	ALDH3B2	ALDH9A1	ALDH3A2	HEMK1	LCMT2	UROC1	TRMT11	AOC1	ALDH7A1	FTCD	AMDHD1	ASPA	LCMT1	HDC
KEGG_TYROSINE_METABOLISM	Tyrosine_Metabolism	MAOB	MAOA	HPD	AOX1	AOC2	TYR	HGD	METTL6	ALDH3A1	COMT	AOC3	BUD23	IL4I1	GSTZ1	DDC	ADH7	DBH	ADH6	METTL2B	ADH1B	ALDH1A3	ADH1C	ALDH3B1	ADH4	ALDH3B2	ADH5	HEMK1	ADH1A	GOT2	LCMT2	TRMT11	GOT1	TYRP1	TAT	MIF	NAA80	PNMT	DCT	LCMT1	TPO	TH	FAH
KEGG_PHENYLALANINE_METABOLISM	Phenylalanine_Metabolism	ALDH1A3	ALDH3B1	ALDH3B2	MAOB	MAOA	HPD	GOT2	AOC2	ALDH3A1	AOC3	PAH	GOT1	PRDX6	TAT	MIF	NAA80	IL4I1	DDC
KEGG_TRYPTOPHAN_METABOLISM	Tryptophan_Metabolism	MAOB	MAOA	IDO2	AOX1	ALDH1B1	AANAT	ALDH2	WARS1	IDO1	CAT	ACAT2	ACAT1	IL4I1	HADH	OGDH	TPH1	HADHA	DDC	AFMID	CYP1A1	CYP1A2	CYP1B1	ASMT	ECHS1	ALDH9A1	KMO	ALDH3A2	WARS2	EHHADH	OGDHL	GCDH	ALDH7A1	AOC1	INMT	TDO2	HAAO	KYNU	AADAT	TPH2	ACMSD
KEGG_BETA_ALANINE_METABOLISM	Beta_Alanine_Metabolism	CNDP1	SRM	ECHS1	ALDH9A1	ALDH3A2	GAD1	GAD2	AOC2	ALDH1B1	HIBCH	ABAT	EHHADH	ALDH2	ACADM	UPB1	ALDH7A1	AOC3	DPYS	DPYD	MLYCD	HADHA	SMS
KEGG_TAURINE_AND_HYPOTAURINE_METABOLISM	Taurine_And_Hypotaurine_Metabolism	GGT7	CSAD	GGT5	GGT1	GAD1	BAAT	GAD2	GGT6	CDO1	ADO
KEGG_SELENOAMINO_ACID_METABOLISM	Selenoamino_Acid_Metabolism	METTL6	AHCY	BUD23	SEPHS1	GGT1	SEPHS2	METTL2B	HEMK1	GGT6	LCMT2	PAPSS1	PAPSS2	TRMT11	MARS2	SCLY	AHCYL1	GGT7	GGT5	MAT2B	MAT1A	LCMT1	CBS	AHCYL2	CTH	MAT2A	MARS1
KEGG_GLUTATHIONE_METABOLISM	Glutathione_Metabolism	SRM	GGT1	GSTP1	GSTT2	GSTT1	GSTZ1	RRM2B	SMS	PGD	GSTO1	GSTA5	MGST2	LAP3	MGST1	MGST3	GSTA3	GSTM1	GPX7	GSTA4	GPX6	GSTM4	GGCT	GSTM3	GSTM2	GSTM5	GSTA1	GSTA2	GSR	GSS	RRM1	RRM2	GCLC	GSTK1	GPX5	TXNDC12	GPX1	GPX2	GPX3	IDH2	GPX4	IDH1	OPLAH	GCLM	GGT6	ANPEP	GGT7	GSTO2	GGT5
KEGG_STARCH_AND_SUCROSE_METABOLISM	Starch_And_Sucrose_Metabolism	ENPP3	GCK	ENPP1	AMY2B	UGT2B28	PGM2	UXS1	UGDH	MGAM	GYS1	GYS2	HK2	HK3	HK1	GBA3	GUSB	TREH	AMY1A	AMY1B	AMY1C	AMY2A	UGT2B11	PYGB	PYGM	PYGL	UGT2A3	UGT1A4	UGT1A1	UGT1A3	UGT1A10	UGT1A8	UGT1A7	UGT1A6	PGM2L1	AGL	UGT1A5	SI	UGT2A1	GBE1	UGT1A9	G6PC2	GANC	G6PC1	UGP2	PGM1	UGT2B10	UGT2B7	UGT2B4
KEGG_AMINO_SUGAR_AND_NUCLEOTIDE_SUGAR_METABOLISM	Amino_Sugar_And_Nucleotide_Sugar_Metabolism	MPI	GCK	GFPT2	GALK1	GALE	PMM2	PGM2	PMM1	AMDHD2	GNPDA2	GMDS	UXS1	GNPNAT1	NANS	UGDH	CYB5R3	GFPT1	FCSK	NANP	CYB5R1	FPGT	HEXB	HEXA	HK2	HK1	HK3	GALT	GNE	NAGK	CHIT1	UAP1	RENBP	CHIA	NPL	UGP2	GALK2	GFUS	PGM1	CMAS	PGM3	GNPDA1	GMPPA	GPI	GMPPB
KEGG_INOSITOL_PHOSPHATE_METABOLISM	Inositol_Phosphate_Metabolism	PLCB2	PLCB1	INPP1	IPMK	PLCD1	PLCB3	PLCB4	MIOX	TPI1	INPP5A	INPP5B	INPP4A	INPPL1	SYNJ2	PIP4K2B	PLCD3	PIKFYVE	IMPA1	IMPA2	PIP5K1A	PIP5K1B	ISYNA1	INPP5J	INPP5K	SYNJ1	PLCD4	ITPKA	ITPKB	ITPK1	CDIPT	INPP4B	PLCE1	ALDH6A1	PIP5K1C	PIK3C3	PIK3C2B	PIK3C2G	PIP4K2A	PIK3C2A	PTEN	PIP4K2C	MINPP1	IPPK	PIK3CA	PIK3CB	PIK3CD	PLCG1	PLCG2
KEGG_PYRUVATE_METABOLISM	Pyruvate_Metabolism	ACSS2	PCK2	ME3	GRHPR	PDHB	PCK1	PDHA1	ALDH1B1	PDHA2	HAGH	ALDH2	ACAT2	ACAT1	LDHC	LDHD	HAGHL	ACSS1	LDHB	ACYP2	ME1	ACYP1	ALDH9A1	ALDH3A2	ME2	DLD	MDH2	DLAT	MDH1	ALDH7A1	PC	GLO1	LDHAL6B	LDHA	ACACB	ACACA	PKLR	AKR1B1	LDHAL6A	PKM	ACOT12
KEGG_GLYOXYLATE_AND_DICARBOXYLATE_METABOLISM	Glyoxylate_And_Dicarboxylate_Metabolism	ACO1	GLYCTK	MTHFD2	GRHPR	CS	HAO1	MDH2	MDH1	MTHFD2L	PGP	MTHFD1L	MTHFD1	HAO2	AFMID	HYI	ACO2
KEGG_PROPANOATE_METABOLISM	Propanoate_Metabolism	ACSS2	ALDH1B1	ABAT	SUCLG2P2	ALDH2	ACADM	ACAT2	ACAT1	LDHC	MCEE	HADHA	ALDH6A1	ACSS1	LDHB	ECHS1	ALDH9A1	ALDH3A2	PCCB	HIBCH	EHHADH	PCCA	ALDH7A1	LDHAL6B	SUCLG1	MLYCD	LDHA	SUCLA2	ACACB	MMUT	SUCLG2	ACACA	ACSS3	LDHAL6A
KEGG_BUTANOATE_METABOLISM	Butanoate_Metabolism	AACS	PDHB	ALDH1B1	ACADS	PDHA1	ABAT	PDHA2	ALDH2	ACAT2	ACAT1	OXCT1	HADH	BDH1	HADHA	ACSM1	HMGCL	AKR1B10	ECHS1	ALDH9A1	GAD1	ALDH3A2	ACSM3	GAD2	ACSM4	HMGCS2	EHHADH	HMGCS1	ALDH7A1	ALDH5A1	BDH2	OXCT2	ACSM2A	ACSM5	L2HGDH
KEGG_RETINOL_METABOLISM	Retinol_Metabolism	RPE65	CYP3A5	UGT2B28	CYP4A11	CYP3A4	RDH8	DHRS3	CYP2C18	ADH1B	ADH1C	ADH4	ADH5	DGAT2	ADH1A	BCO1	RDH10	CYP26A1	UGT2B11	CYP2C9	AWAT2	CYP26C1	CYP2C19	CYP2C8	CYP2B6	UGT2A3	CYP2A13	UGT1A4	CYP3A7	UGT1A1	UGT1A3	CYP26B1	DHRS9	UGT1A10	DGAT1	UGT1A8	UGT1A7	UGT1A6	ALDH1A1	RETSAT	RDH12	LRAT	RDH11	UGT1A5	CYP2A6	CYP2A7	CYP4A22	DHRS4	CYP1A1
KEGG_PORPHYRIN_AND_CHLOROPHYLL_METABOLISM	Porphyrin_And_Chlorophyll_Metabolism	ALAS1	COX10	UGT1A10	ALAS2	UGT1A8	UGT1A7	ALAD	UGT1A6	CPOX	BLVRA	UGT2B28	BLVRB	UGT1A5	UROS	HCCS	UGT2A1	GUSB	FTMT	UGT1A9	MMAB	FECH	HMOX1	HMOX2	UGT2B11	PPOX	FTH1	UGT2B10	UGT2B7	UROD	UGT2B4	COX15	HMBS	CP	UGT2A3	UGT1A4	EARS2	UGT2B17	UGT1A1	EPRS1	UGT2B15	UGT1A3
KEGG_NITROGEN_METABOLISM	Nitrogen_Metabolism	CA5A	CA5B	CA6	CA12	CA7	GLUD2	CA2	CPS1	CA3	CA4	GLS2	GLUL	CA8	CA14	GLUD1	CA9	CA1	GLS	AMT	HAL	ASNS	CA13	CTH
KEGG_SULFUR_METABOLISM	Sulfur_Metabolism	SULT1E1	PAPSS1	SULT1A4	SULT1A3	PAPSS2	CHST11	SULT1A1	SULT2B1	SUOX	BPNT1	CHST13	SULT1A2	CHST12
KEGG_METABOLISM_OF_XENOBIOTICS_BY_CYTOCHROME_P450	Metabolism_Of_Xenobiotics_By_Cytochrome_P450	CYP2F1	CYP2E1	AKR1C4	EPHX1	CYP3A5	UGT2B28	CYP3A4	GSTP1	GSTT2	GSTT1	AKR1C3	GSTZ1	CYP2C18	ADH1B	CYP2S1	ADH1C	ADH4	ADH5	GSTO1	ADH1A	GSTA5	MGST2	MGST1	MGST3	GSTA3	GSTM1	UGT2B11	CYP2C9	GSTA4	CYP2C19	GSTM4	CYP2C8	GSTM3	CYP2B6	GSTM2	UGT2A3	UGT1A4	UGT1A1	CYP3A7	UGT1A3	GSTM5	UGT1A10	UGT1A8	UGT1A7	GSTA1	UGT1A6	GSTA2	ALDH3A1
KEGG_DRUG_METABOLISM_CYTOCHROME_P450	Drug_Metabolism_Cytochrome_P450	CYP2E1	CYP3A5	UGT2B28	CYP3A4	GSTP1	GSTT2	GSTT1	GSTZ1	CYP2C18	CYP2D6	ADH1B	FMO4	ADH1C	ADH4	ADH5	GSTO1	ADH1A	GSTA5	MGST2	MGST1	FMO1	FMO2	MGST3	FMO3	GSTA3	GSTM1	UGT2B11	CYP2C9	FMO5	GSTA4	CYP2C19	GSTM4	CYP2C8	GSTM3	CYP2B6	GSTM2	UGT2A3	CYP2A13	UGT1A4	UGT1A1	CYP3A7	UGT1A3	GSTM5	UGT1A10	UGT1A8	UGT1A7	GSTA1	UGT1A6
KEGG_DRUG_METABOLISM_OTHER_ENZYMES	Drug_Metabolism_Other_Enzymes	XDH	CYP3A5	UGT2B28	UPB1	CYP3A4	GMPS	UPP2	HPRT1	CDA	GUSB	IMPDH1	IMPDH2	CES2	UCKL1	UGT2B11	TPMT	NAT1	CES5A	CYP2A13	UGT2A3	UGT1A4	CYP3A7	UGT1A1	UGT1A3	UGT1A10	UGT1A8	UGT1A7	ITPA	UGT1A6	UGT1A5	CYP2A6	CYP2A7	DPYS	TYMP	DPYD	UMPS	UCK2	TK1	TK2	UPP1	UGT2A1	CYP3A43	CES1	UGT1A9	NAT2	UGT2B10	UGT2B7	UGT2B4
[truncated: 111 more columns]
